# Supplementary material for: The Impact of WHO Essential Medicines Policies on Inappropriate Use of Antibiotics
Source: PLoS One. 2016 Mar 22;11(3):e0152020. doi: 10.1371/journal.pone.0152020 (PMC4803297; doi:10.1371/journal.pone.0152020)
Supplement: S1 Table — (XLSX) [file pone.0152020.s001.xlsx]

## Sheet: Sheet1
Country	Drugs dispensed free of charge for children < 5year	Drugs dispensed free of charged to all patients	No prescribing by staff with < 1 month's training	Undergraduate training of doctors on standard treatment guidelines	Undergraduate training of nurses in standard treatment guidelines	Drug and Therapeutic committees in half or more of provinces	Drug and Therapeutic Committees in half or more of general hospitals	Formulary manual updated within the last 5 years	Essential Medicines List updated in the last 2 years	National Drug Information Centre	Public education on antibiotic in the past 2 years	National MOH unit on promoting rational use of medicines	National Antimicrobial Resistance strategy	Antibiotics not available over-the-counter	No drug sales revenue used to supplement prescriber income	Joint regulation of drug promotion by government and industry
Armenia	1	0	1	1	0	1	1	1	1	1	1	1	1	0	1	0
Angola								0
Bahrain	1	1	1			0	0	1	1	0	1	1	1	1	1	0
Bolivia	1	0	0	1	1	0	0	1	1	1		1	1	0	0	0
Brazil	1	1	1			0	0	0	1	1	0	1	1	0	1	0
Burkina Faso	0	0		1	1	0	1	0	1	1	0	0	0	0	1
Burundi															0	1
Cambodia	1	0	1	1	1	1	1	1	1	0	1		0	0	0	0
Cameroon	0	0	0	1	1	1	1	0	1	0	0	0	0	0	0	0
China	0	0	1	0	0	1	1	0	1	0	1	0	0	0	0	1
Colombia	0		0			1	1	0	1	1	0		0	0	1	0
Congo	0	0	0	0	0	0	0	0	1	0	0	0	0	0	0	0
Cuba	1	1	1	0	0	1	1	1	1	1	1	1	1	1	1
DRCongo		0	1	0	0	0	0	0	1	0	1	0	0	0		0
Egypt	1	1	1	0	0	1	1	0		1	1	0	0	0	1
Ethiopia	0	0	0			0	0	0	0	1	1	1	0	1	1	0
Gambia	1	0	1	0	1	0	0	0	1	0	0	0	0	0	1	0
Ghana	1	0		1	1	1	0	1	0	1	1	1	0	0	0	0
Guatemala								0					0	0		0
Guinea	0	0	1	1	0	1	1	0	1	0	0		0	1	1	0
India	1	1				0	0	0	0	1	1	0	0	0	1
Indonesia	1	1	1	1	1		1	1	1	1	1	1		0	0	1
Iran	1	1	1	1	1	1	1	1		1	1	1	1	1	1	0
Jordan	0	0	1			0		1	0	0	1	0	0	1		1
Kenya	1	0	1			0	0	0		0	0	0		0	0	0
Kyrgyzstan	0	0	1	1	0	1	1	1	1	1	1		1	0	0	0
Laos	0	0	0	1	1	1	1	0	1	1	1	1		0	1	1
Malawi				1	1	0		1	0	0		0	0	1	1	0
Malaysia	1	1				1	1	0		1				1	1	0
Mali		0	0	0	1	0	0	1			0	0	0	1	0
Mongolia	1	0	1	1	1	1	0	1	1	1	1	1	0	0	1	0
Morocco	1	1	1	0	0	0	0	1	1	0	0	0	0	0		0
Mozambique	0	0		1	1					1	0	0		1	1	0
Namibia	0	1	1			1	1	0	0	1	0	1	0	1	1	0
Nepal	0	0	0	0	0	0	0	0	1	1	1	0	1	0	1	0
Niger				0	0	0	0	1	0	0	0	0	0	0	1	0
Nigeria	0	0	1	0	0		0	0			0	0	0	0	0	0
Oman	1	1	1	1		1	1	1	1	1	1	1	1	1	1	0
Pakistan	0	0	1	0	0			0	0	0	1	1	0	1	1	0
Peru	1	0				0	1	1	1	1	0		1	0	0	0
Philippines	1	1		1	1	1	1	0	0	1	1	1	1	0	1	1
Rwanda	0	0	1				1	0	1	0	0	0	0	1	0	0
Samoa	0	0	1	1	1	0	0	0		0	1	0		0	1	0
Senegal	0	0	1	0	0	0	0	0	1	0	0	0	0	0	0	0
SerbMont	1	0	1					1		0		0	0		0	1
SAfrica	1	1	1	1	1	1		1	1	1		0		1	1	1
Sudan		0	1	0	0	0	0	0	1	0	0	0		0	1	0
Thailand	1	0						1		1						0
Tonga	1	1	1					0	1	0	1	1	1	1	1	0
Tunisia	1	1	1	0	0	0	0	1		0	1	1	0	0	1	0
Uganda	1	1	0	1	1	0	0	0	1		1	1	0	0	1	0
Tanzania	1	0	1	1	1	0	0	0	0		0	0	0	1	1	0
Uzbekistan		0		0	0			0		0		0	0	0	1	0
Viet Nam	1	0	1	1		1	1	1	0	1	1	1	1	1		0
Zambia	1	1	0	1	1	0	0	1		0	1	0	1	1	1	1
